# Supplementary material
Source: HighWire-hosted journal article supplement (https://www.annfammed.org/highwire/filestream/8792/field_highwire_adjunct_files/0/Hayes_Supp_App.pdf)

## Supplemental material for

Hayes WC. Using QR codes to connect patients to health information. *Ann Fam Med*. 2017;15(3):275.

Warren C. Hayes, MD

Physicians Clinic – Red Oak, Red Oak, Iowa

## Supplemental Appendix

Figure 1

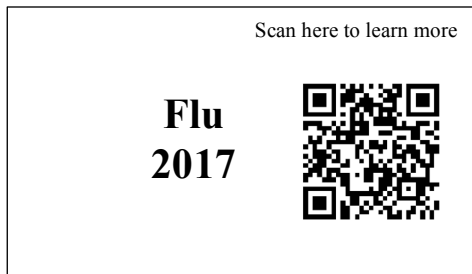

Figure 2

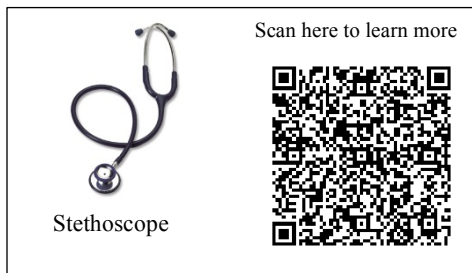

Supplement: Hayes_Supp_App.pdf [file Hayes_Supp_App.pdf]
